# Supplementary material
Source: PubMed Central journal article supplement (PMC5984704)

Supplementary Figure S1

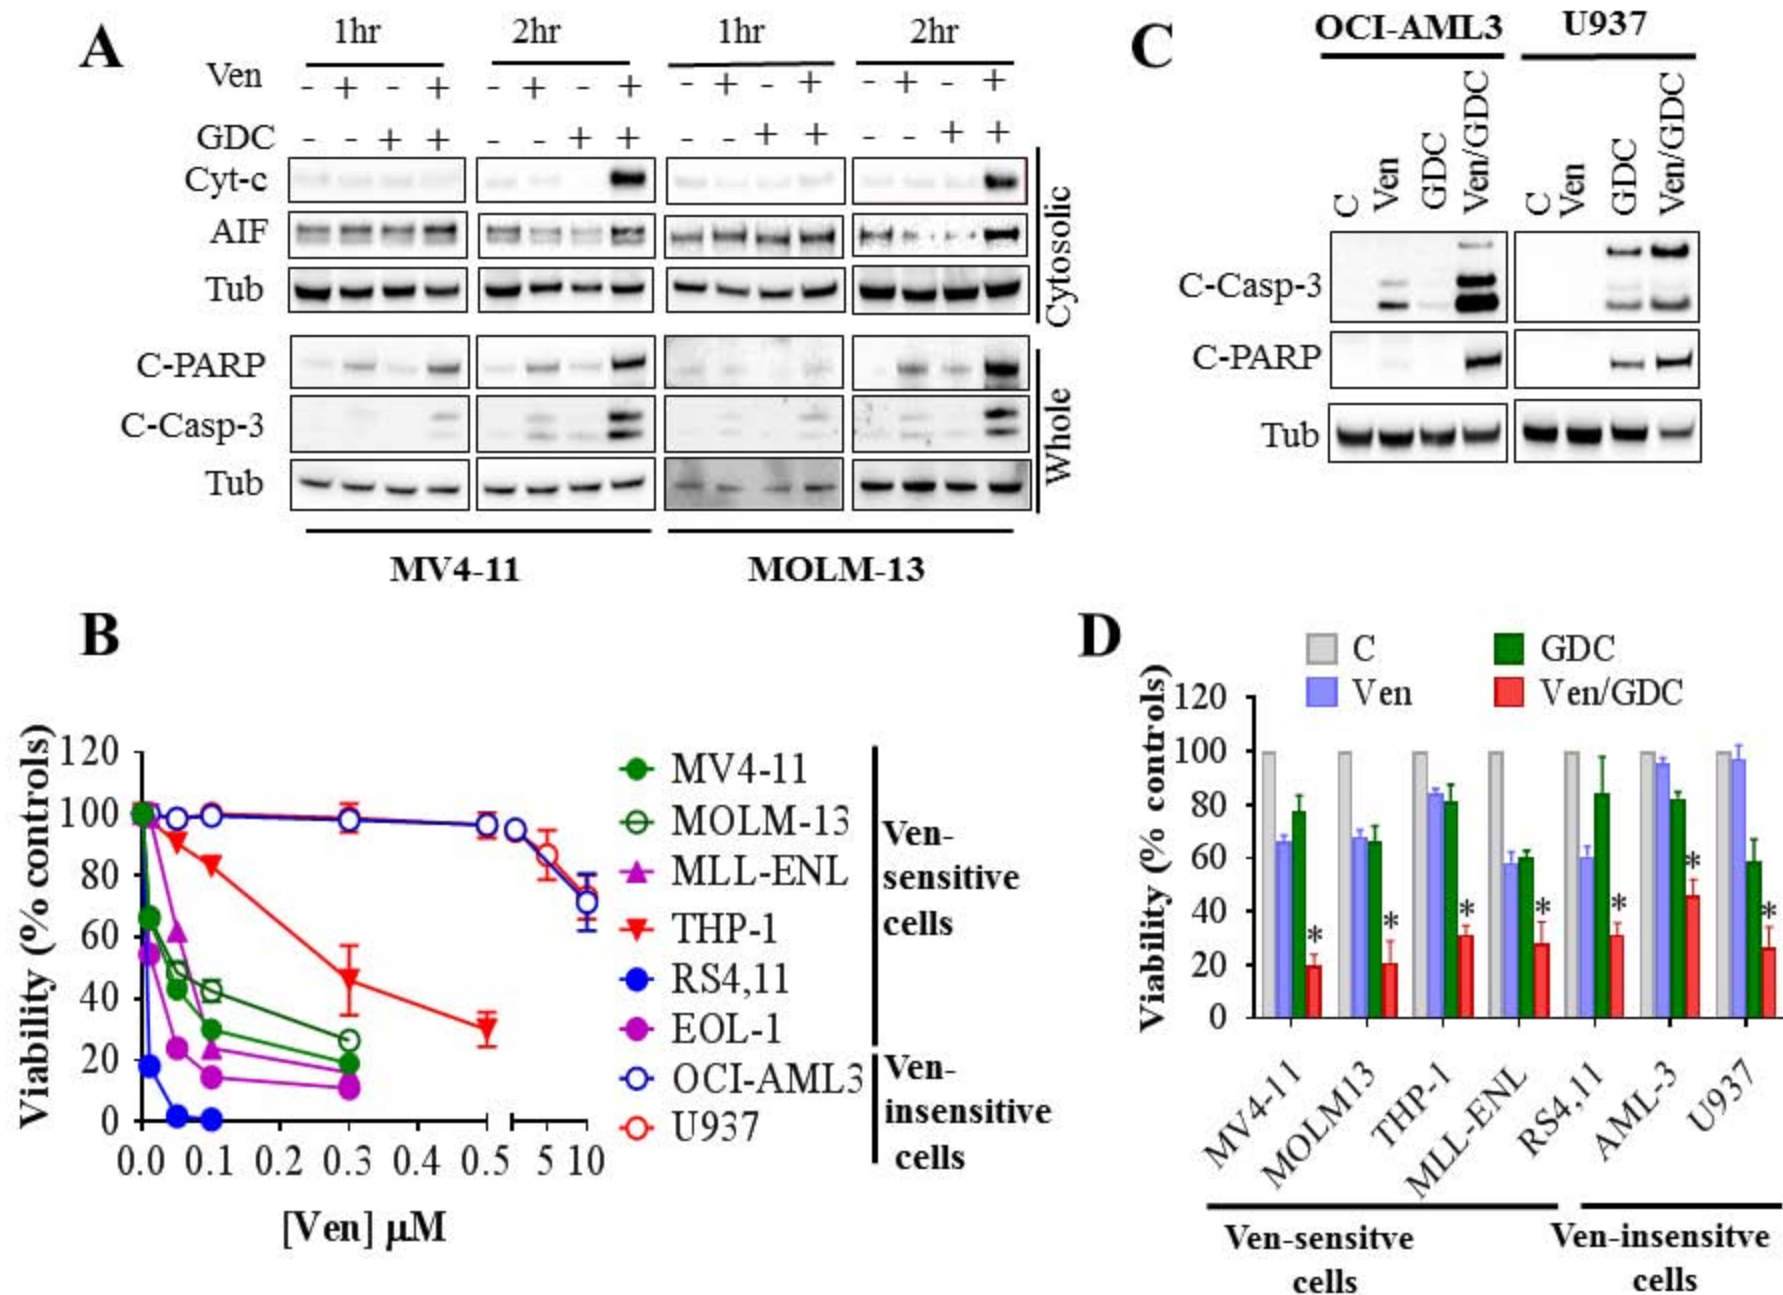

# Supplementary Figure S2

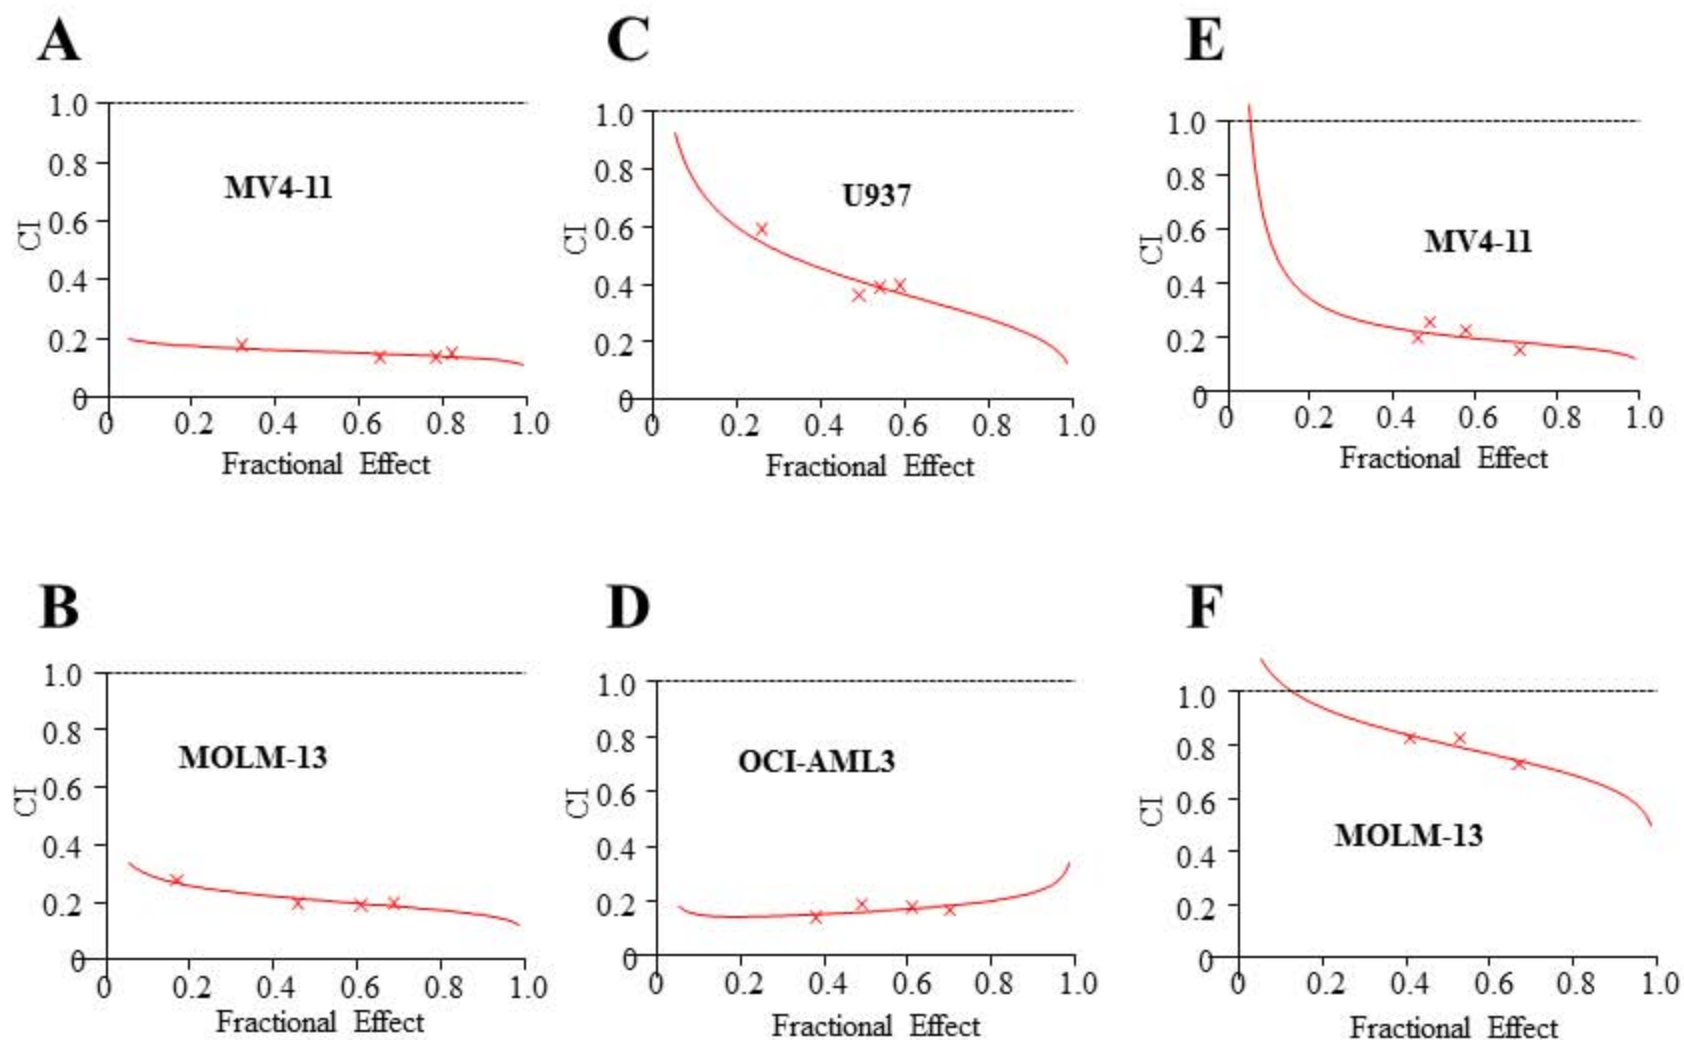

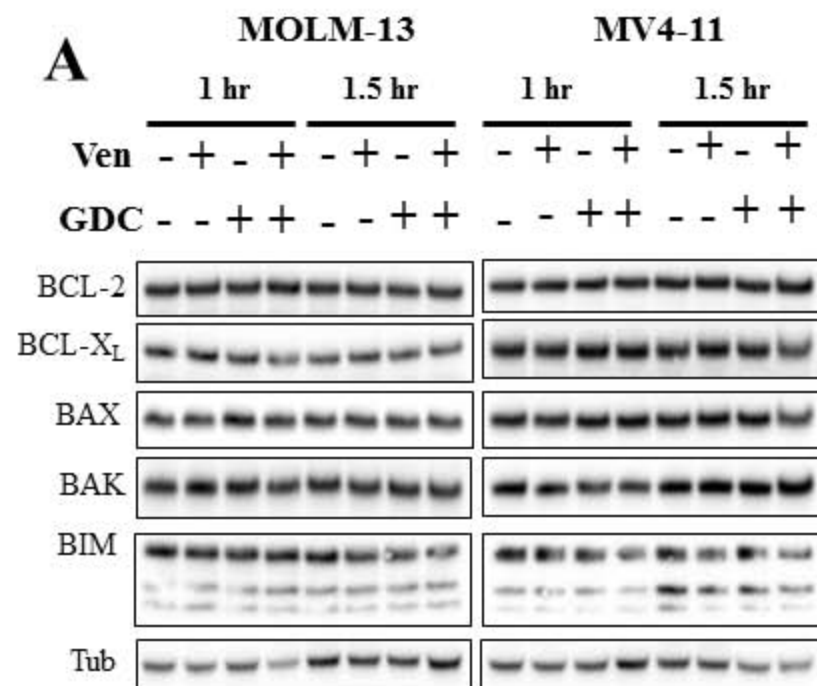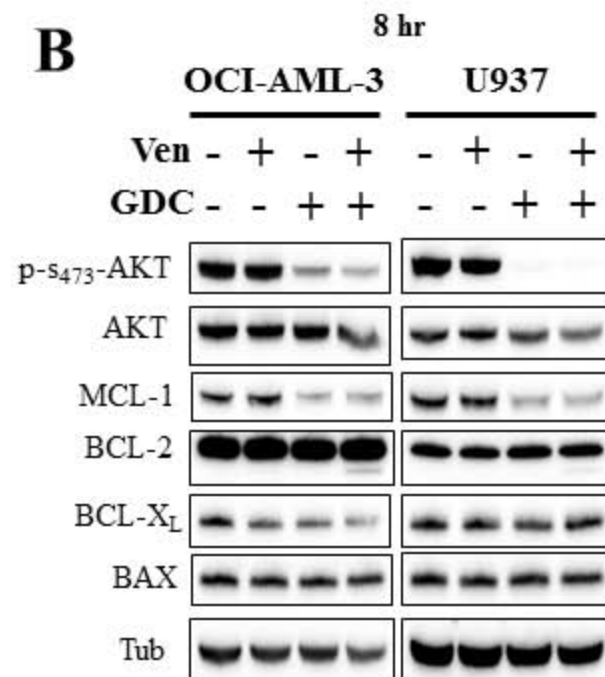



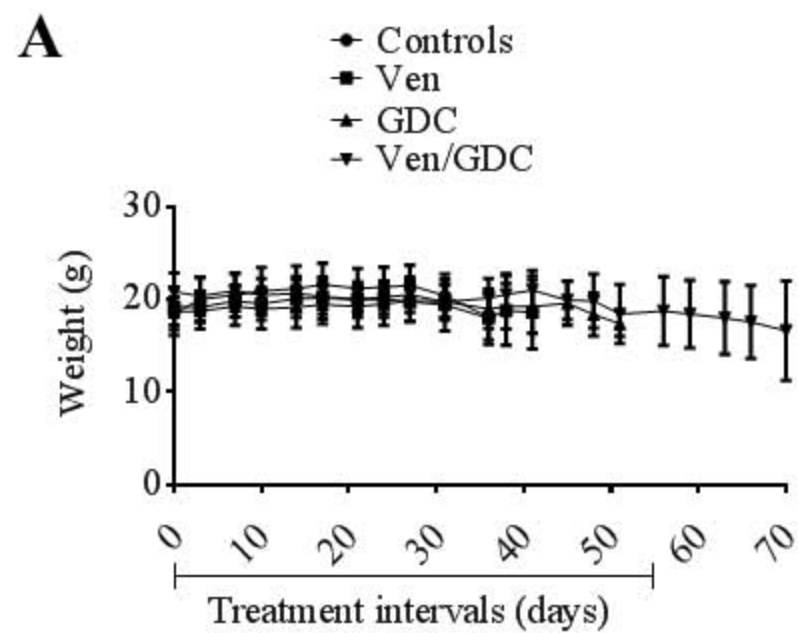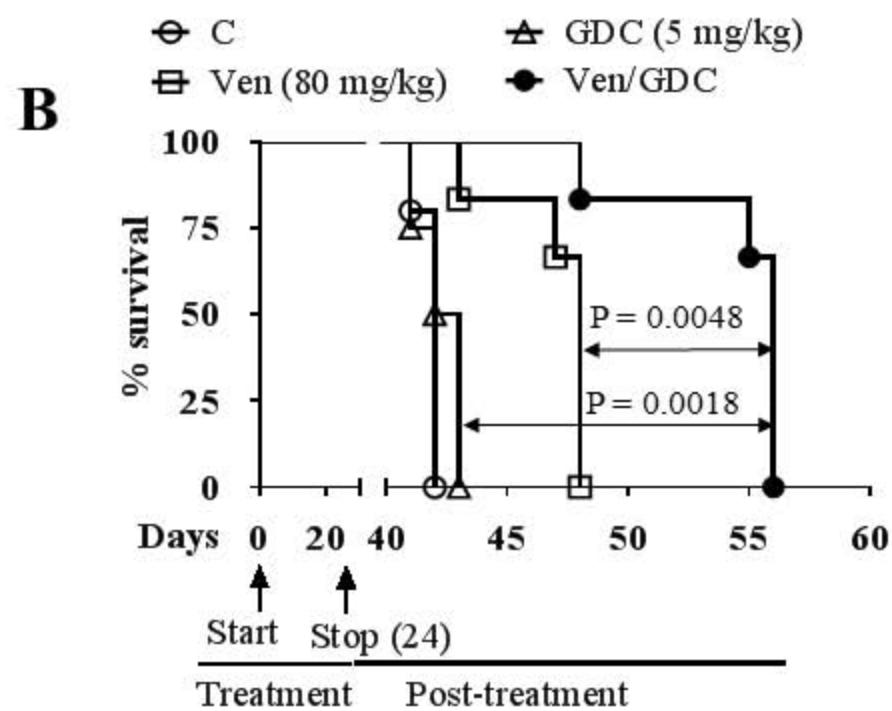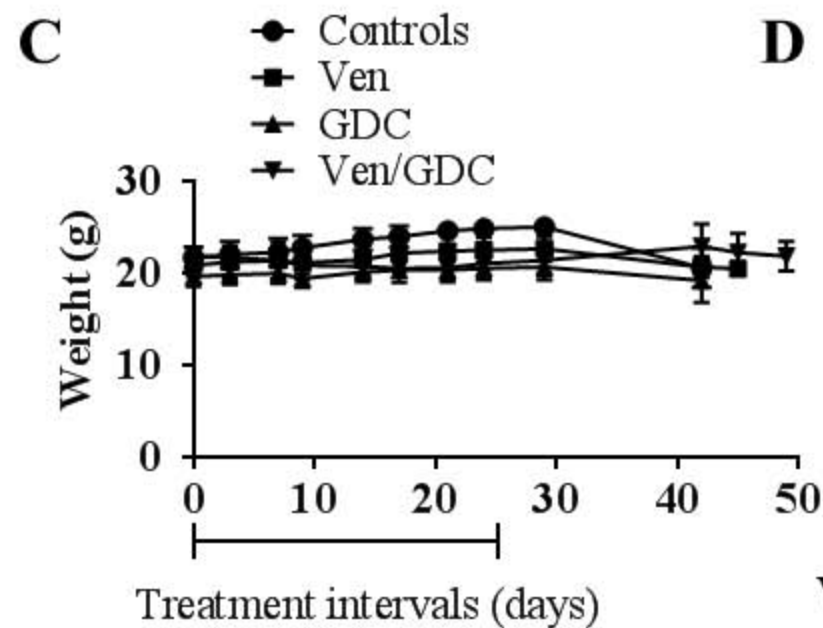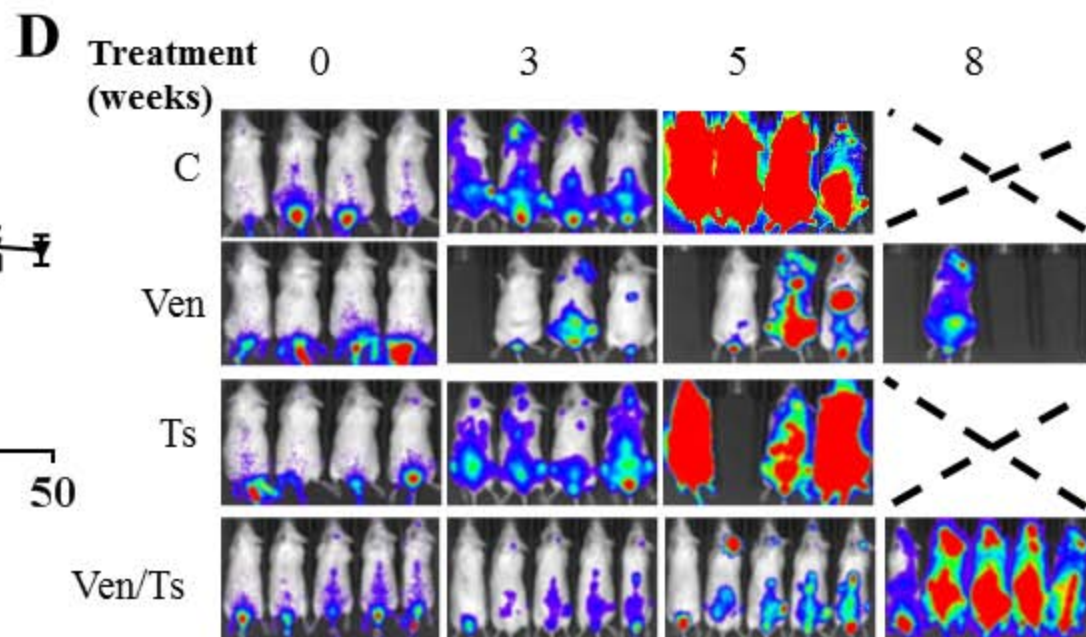

**E**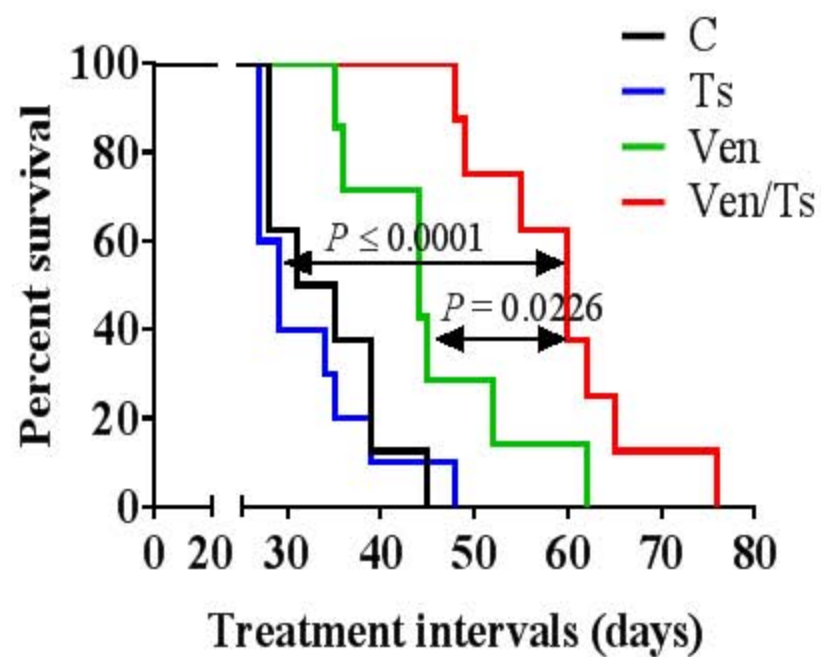**F**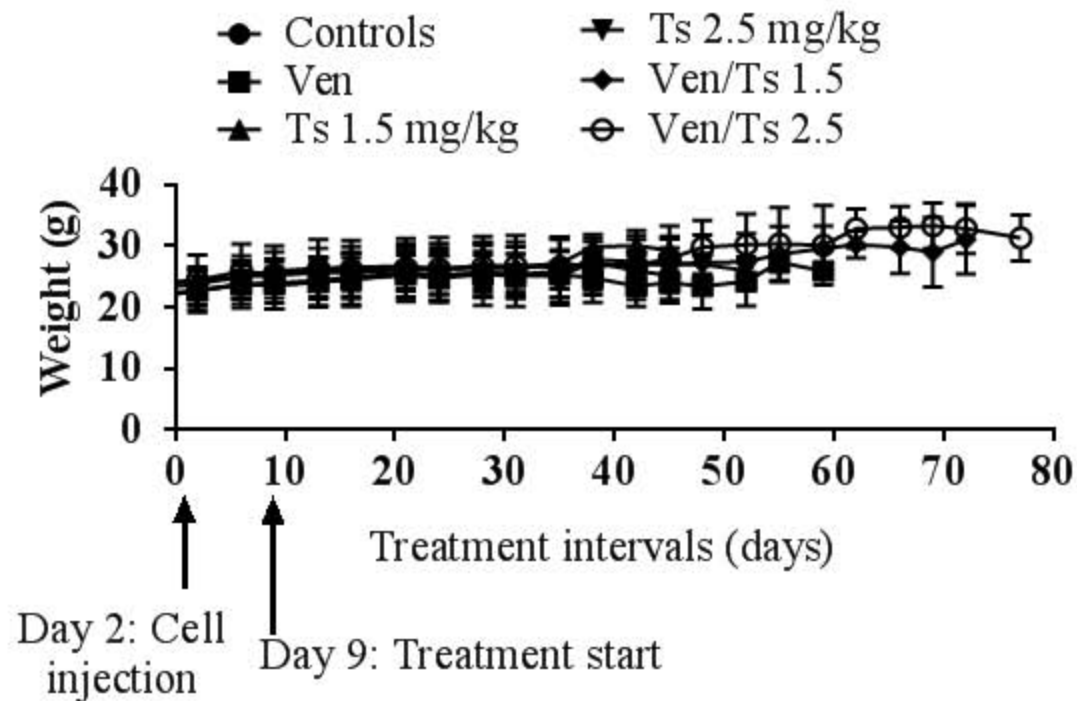



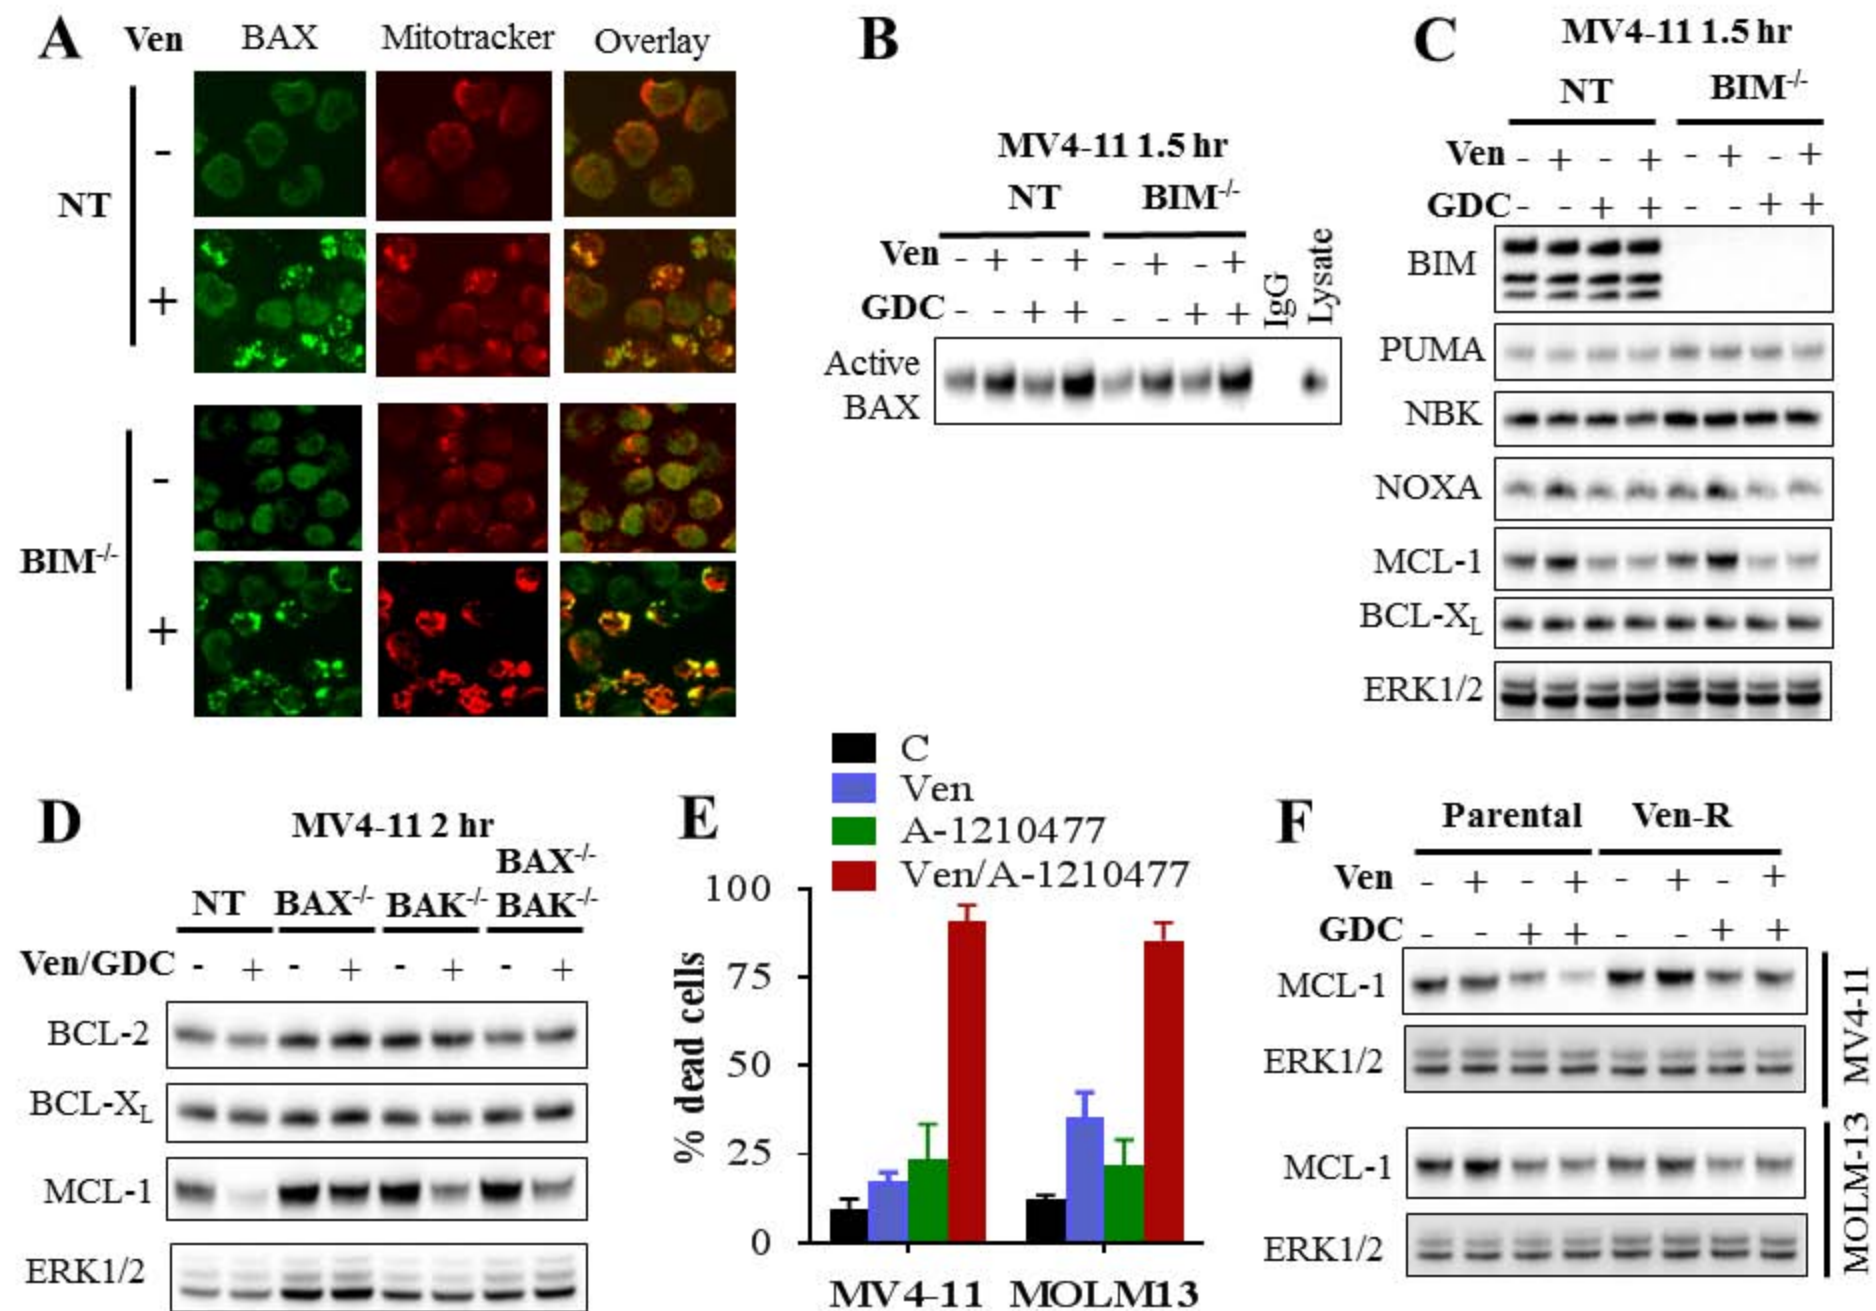

Supplementary Figure S7

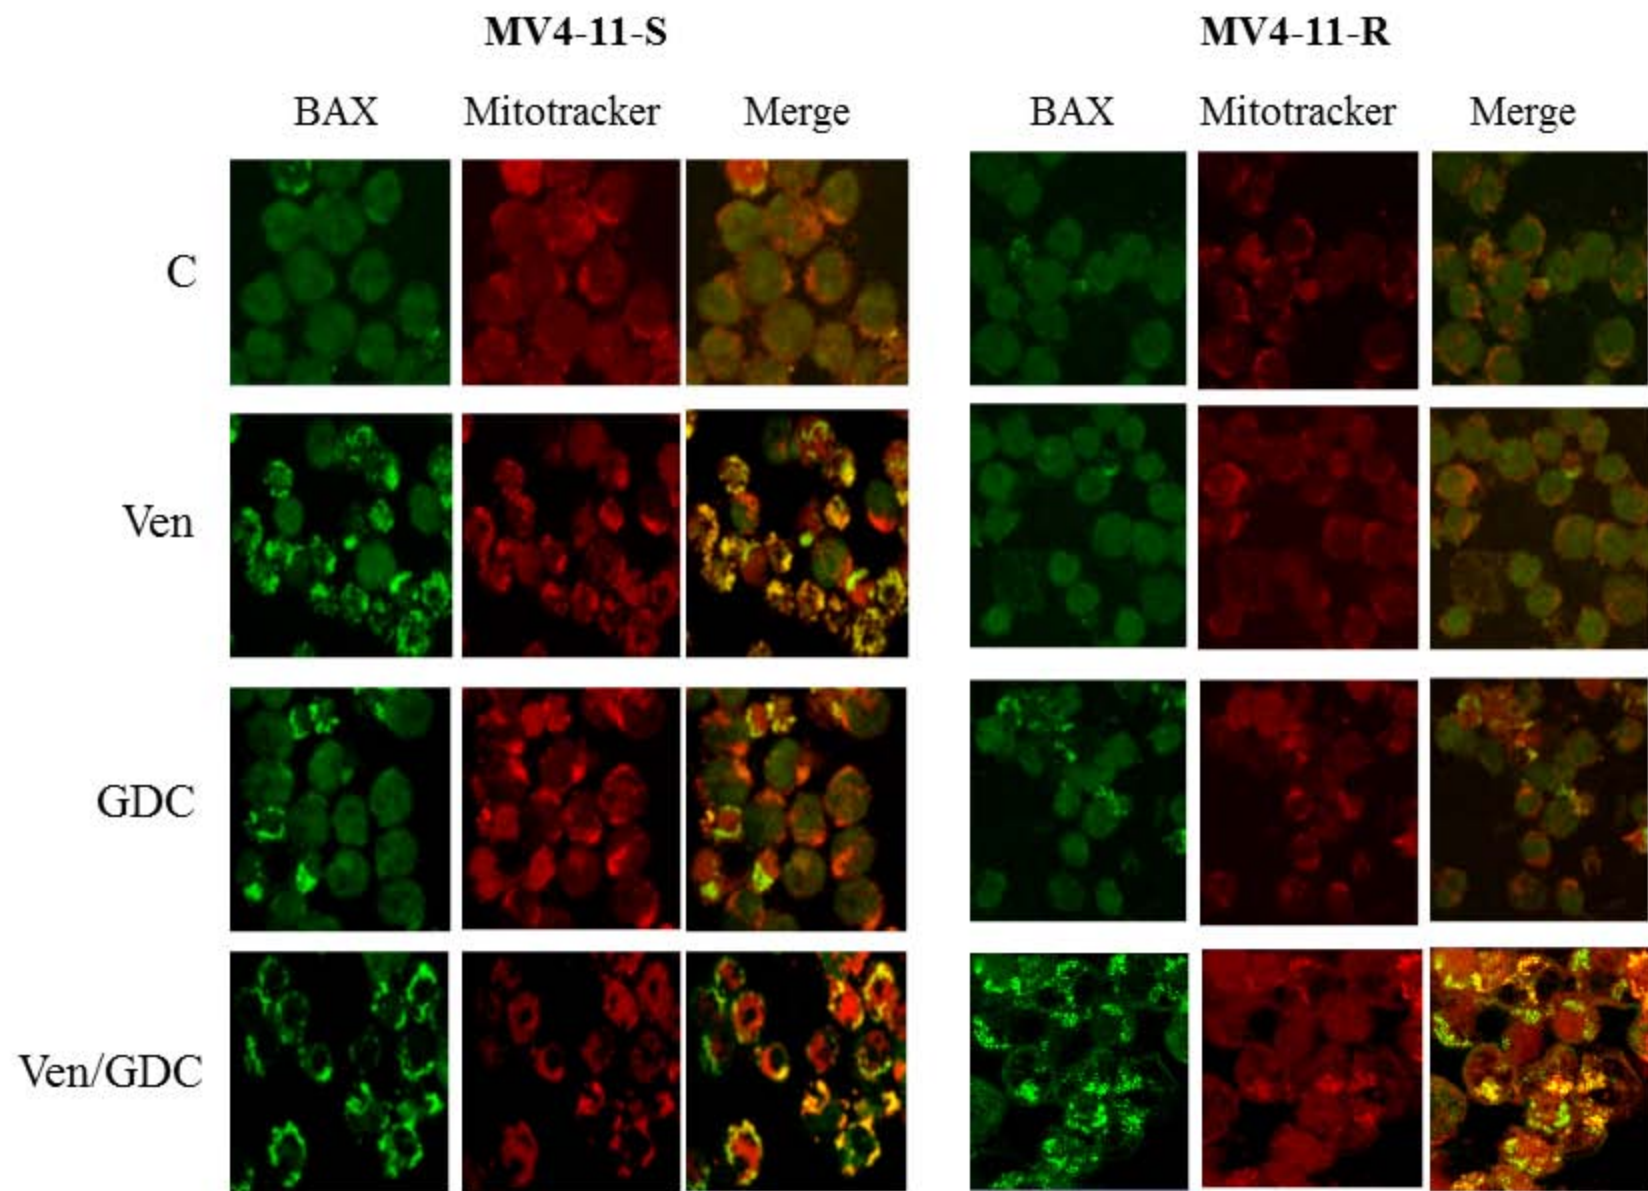

Supplement: NIHMS954404-supplement-1.pdf [file NIHMS954404-supplement-1.pdf]
